# Supplementary material
Source: publisher site journal article supplement (https://www.dovepress.com/article/132839)
Supplement: Supplementary file 1 [file get_supplementary_file.php]

**SUPPLEMENTARY DATA**

**Suppl. Table 1.** Chronic respiratory disease ICD-9 codes resulting in patient exclusion

| <b>Disease Category</b>                  | <b>ICD-9 Codes</b> |       |       |       |       |
|------------------------------------------|--------------------|-------|-------|-------|-------|
| Asthma+COPD                              | 49320              | 49321 | 49322 |       |       |
| COPD                                     | 490                | 49122 | 4940  | 49120 | 4928  |
|                                          | 4910               | 4918  | 4941  | 49121 | 5181  |
|                                          | 4911               | 4919  | 496   | 4920  | 5182  |
| Other chronic lower respiratory diseases | 01000              | 01191 | 01381 | 01611 | 01751 |
|                                          | 01001              | 01192 | 01382 | 01612 | 01752 |
|                                          | 01002              | 01193 | 01383 | 01613 | 01753 |
|                                          | 01003              | 01194 | 01384 | 01614 | 01754 |
|                                          | 01004              | 01195 | 01385 | 01615 | 01755 |
|                                          | 01005              | 01196 | 01386 | 01616 | 01756 |
|                                          | 01006              | 01200 | 01390 | 01620 | 01760 |
|                                          | 01010              | 01201 | 01391 | 01621 | 01761 |
|                                          | 01011              | 01202 | 01392 | 01622 | 01762 |
|                                          | 01012              | 01203 | 01393 | 01623 | 01763 |
|                                          | 01013              | 01204 | 01394 | 01624 | 01764 |
|                                          | 01014              | 01205 | 01395 | 01625 | 01765 |
|                                          | 01015              | 01206 | 01396 | 01626 | 01766 |
|                                          | 01016              | 01210 | 01400 | 01630 | 01770 |
|                                          | 01080              | 01211 | 01401 | 01631 | 01771 |
|                                          | 01081              | 01212 | 01402 | 01632 | 01772 |
|                                          | 01082              | 01213 | 01403 | 01633 | 01773 |
|                                          | 01083              | 01214 | 01404 | 01634 | 01774 |
|                                          | 01084              | 01215 | 01405 | 01635 | 01775 |
|                                          | 01085              | 01216 | 01406 | 01636 | 01776 |
|                                          | 01086              | 01220 | 01480 | 01640 | 01780 |
|                                          | 01090              | 01221 | 01481 | 01641 | 01781 |
|                                          | 01091              | 01222 | 01482 | 01642 | 01782 |
|                                          | 01092              | 01223 | 01483 | 01643 | 01783 |
|                                          | 01093              | 01224 | 01484 | 01644 | 01784 |
|                                          | 01094              | 01225 | 01485 | 01645 | 01785 |
|                                          | 01095              | 01226 | 01486 | 01646 | 01786 |
|                                          | 01096              | 01230 | 01500 | 01650 | 01790 |
|                                          | 01100              | 01231 | 01501 | 01651 | 01791 |
|                                          | 01101              | 01232 | 01502 | 01652 | 01792 |
|                                          | 01102              | 01233 | 01503 | 01653 | 01793 |
|                                          | 01103              | 01234 | 01504 | 01654 | 01794 |
|                                          | 01104              | 01235 | 01505 | 01655 | 01795 |
|                                          | 01105              | 01236 | 01506 | 01656 | 01796 |
|                                          | 01106              | 01280 | 01510 | 01660 | 01800 |
|                                          | 01110              | 01281 | 01511 | 01661 | 01801 |
|                                          | 01111              | 01282 | 01512 | 01662 | 01802 |
|                                          | 01112              | 01283 | 01513 | 01663 | 01803 |
|                                          | 01113              | 01284 | 01514 | 01664 | 01804 |
|                                          | 01114              | 01285 | 01515 | 01665 | 01805 |
| 01115                                    | 01286              | 01516 | 01666 | 01806 |       |
| 01116                                    | 01300              | 01520 | 01670 | 01880 |       |
| 01120                                    | 01301              | 01521 | 01671 | 01881 |       |
| 01121                                    | 01302              | 01522 | 01672 | 01882 |       |
| 01122                                    | 01303              | 01523 | 01673 | 01883 |       |

| Disease Category | ICD-9 Codes |       |       |       |       |
|------------------|-------------|-------|-------|-------|-------|
|                  | 01123       | 01304 | 01524 | 01674 | 01884 |
|                  | 01124       | 01305 | 01525 | 01675 | 01885 |
|                  | 01125       | 01306 | 01526 | 01676 | 01886 |
|                  | 01126       | 01310 | 01550 | 01690 | 01890 |
|                  | 01130       | 01311 | 01551 | 01691 | 01891 |
|                  | 01131       | 01312 | 01552 | 01692 | 01892 |
|                  | 01132       | 01313 | 01553 | 01693 | 01893 |
|                  | 01133       | 01314 | 01554 | 01694 | 01894 |
|                  | 01134       | 01315 | 01555 | 01695 | 01895 |
|                  | 01135       | 01316 | 01556 | 01696 | 01896 |
|                  | 01136       | 01320 | 01560 | 01700 | 5110  |
|                  | 01140       | 01321 | 01561 | 01701 | 5111  |
|                  | 01141       | 01322 | 01562 | 01702 | 4950  |
|                  | 01142       | 01323 | 01563 | 01703 | 4951  |
|                  | 01143       | 01324 | 01564 | 01704 | 4952  |
|                  | 01144       | 01325 | 01565 | 01705 | 4953  |
|                  | 01145       | 01326 | 01566 | 01706 | 4954  |
|                  | 01146       | 01330 | 01570 | 01710 | 4955  |
|                  | 01150       | 01331 | 01571 | 01711 | 4956  |
|                  | 01151       | 01332 | 01572 | 01712 | 4957  |
|                  | 01152       | 01333 | 01573 | 01713 | 4958  |
|                  | 01153       | 01334 | 01574 | 01714 | 4959  |
|                  | 01154       | 01335 | 01575 | 01715 | 4760  |
|                  | 01155       | 01336 | 01576 | 01716 | 4761  |
|                  | 01156       | 01340 | 01580 | 01720 | 500   |
|                  | 01160       | 01341 | 01581 | 01721 | 501   |
|                  | 01161       | 01342 | 01582 | 01722 | 502   |
|                  | 01162       | 01343 | 01583 | 01723 | 503   |
|                  | 01163       | 01344 | 01584 | 01724 | 504   |
|                  | 01164       | 01345 | 01585 | 01725 | 505   |
|                  | 01165       | 01346 | 01586 | 01726 | 5061  |
|                  | 01166       | 01350 | 01590 | 01730 | 5062  |
|                  | 01170       | 01351 | 01591 | 01731 | 5063  |
|                  | 01171       | 01352 | 01592 | 01732 | 5064  |
|                  | 01172       | 01353 | 01593 | 01733 | 5069  |
|                  | 01173       | 01354 | 01594 | 01734 | 5070  |
|                  | 01174       | 01355 | 01595 | 01735 | 5071  |
|                  | 01175       | 01356 | 01596 | 01736 | 5078  |
|                  | 01176       | 01360 | 01600 | 01740 | 5080  |
|                  | 01180       | 01361 | 01601 | 01741 | 5081  |
|                  | 01181       | 01362 | 01602 | 01742 | 5082  |
|                  | 01182       | 01363 | 01603 | 01743 | 5088  |
|                  | 01183       | 01364 | 01604 | 01744 | 5089  |
|                  | 01184       | 01365 | 01605 | 01745 | 515   |
|                  | 01185       | 01366 | 01606 | 01746 | 51282 |
|                  | 01186       | 01380 | 01610 | 01750 | 51283 |
|                  | 01190       | 5172  | 5178  | 51883 | 51884 |

**Suppl. Table 2.** Asthma-related ICD-9 codes to identify asthma exacerbations

| <b>Category</b>                              | <b>ICD-9 Codes</b> |       |       |       |       |
|----------------------------------------------|--------------------|-------|-------|-------|-------|
| Asthma                                       | 49300              | 49311 | 49390 | 49310 | 49392 |
|                                              | 49301              | 49312 | 49391 | 49381 | 49382 |
|                                              | 49302              | 49310 |       |       |       |
| Other non-chronic lower respiratory diseases | 5100               | 51633 | 5185  | 5160  | 5193  |
|                                              | 5109               | 51634 | 51851 | 5161  | 5194  |
|                                              | 5130               | 51635 | 51852 | 5162  | 5198  |
|                                              | 5131               | 51636 | 51853 | 5163  | 51902 |
|                                              | 5120               | 51637 | 5186  | 51630 | 51909 |
|                                              | 5121               | 5164  | 5187  | 51631 | 51911 |
|                                              | 5122               | 5165  | 51881 | 51632 | 51919 |
|                                              | 5128               | 51661 | 51882 | 5199  | 5171  |
|                                              | 51281              | 51662 | 51889 | 51669 | 5180  |
|                                              | 51284              | 51663 | 51900 | 5168  | 5183  |
|                                              | 51289              | 51664 | 51901 | 5169  | 5184  |
| LRTI pneumonia                               | 0330               | 4821  | 48284 | 4803  | 48242 |
|                                              | 0331               | 4822  | 48289 | 4808  | 48249 |
|                                              | 0338               | 48230 | 4829  | 4809  | 48281 |
|                                              | 0339               | 48231 | 4830  | 481   | 48282 |
|                                              | 0415               | 48232 | 4831  | 4820  | 48283 |
|                                              | 4800               | 48239 | 4838  | 486   | 4847  |
|                                              | 4801               | 48240 | 4841  | 4845  | 4848  |
|                                              | 4802               | 48241 | 4843  | 4846  | 485   |
| LRTI influenza                               | 4870               | 48801 | 48812 | 488   | 4881  |
|                                              | 4871               | 48802 | 48819 | 4880  | 48811 |
|                                              | 4878               | 48809 | 48881 | 48882 | 48889 |
| LRTI bronchitis and bronchiolitis            | 4660               | 46611 | 46619 | 5060  |       |
| LRTI other                                   | 1363               | 5119  | 78609 | 46421 | 78604 |
|                                              | 3061               | 78600 | 7862  | 5118  | 78605 |
|                                              | 46400              | 78601 | 7863  | 51181 | 78606 |
|                                              | 46401              | 78602 | 78630 | 51189 | 78607 |
|                                              | 46420              | 78603 | 78631 | 79539 | 78639 |
|                                              | 7864               | 7867  | 7869  |       |       |

LRTI, lower respiratory tract infection

**Suppl. Table 3.** Respiratory investigation procedure codes to identify asthma exacerbations

| <b>Procedure</b>                    | <b>Code</b> | <b>Type of Code</b> |
|-------------------------------------|-------------|---------------------|
| Chest X-ray                         | 71010       | CPT-4               |
| Chest X-ray                         | 71015       | CPT-4               |
| Chest X-ray                         | 71020       | CPT-4               |
| Chest X-ray                         | 71021       | CPT-4               |
| Chest X-ray                         | 71022       | CPT-4               |
| Chest X-ray and fluoroscopy         | 71023       | CPT-4               |
| Chest X-ray                         | 71030       | CPT-4               |
| Chest X-ray and fluoroscopy         | 71034       | CPT-4               |
| Chest X-ray                         | 71035       | CPT-4               |
| Contrast X-ray of bronchi           | 71040       | CPT-4               |
| Contrast X-ray of bronchi           | 71060       | CPT-4               |
| X-ray exam of ribs/chest            | 71101       | CPT-4               |
| X-ray exam of ribs/chest            | 71111       | CPT-4               |
| MRI chest without dye               | 71550       | CPT-4               |
| MRI chest with dye                  | 71551       | CPT-4               |
| MRI chest without & with dye        | 71552       | CPT-4               |
| MRI ANGIO chest with or without dye | 71555       | CPT-4               |
| Plain radiography/thoracic aorta    | B300        | ICD10               |
| Plain radiography of thoracic aorta | B300ZZZ     | ICD10               |
| Plain radiography respiratory sys   | BB0         | ICD10               |
| Plain radiography/upper airways     | BB0D        | ICD10               |
| Plain radiography of upper airways  | BB0DZZZ     | ICD10               |
| Plain radiography/thoracic discs    | BR02        | ICD10               |
| Plain radiography of thoracic discs | BR02ZZZ     | ICD10               |
| Plain radiography/thoracic spine    | BR07        | ICD10               |
| Plain radiography of thoracic spine | BR07ZZZ     | ICD10               |
| Plain radiography/chest             | BW03        | ICD10               |
| Plain radiography of chest          | BW03ZZZ     | ICD10               |
| CT thorax without dye               | 71250       | CPT-4               |
| CT thorax with dye                  | 71260       | CPT-4               |
| CT thorax without & with dye        | 71270       | CPT-4               |
| CT angiography, chest               | 71275       | CPT-4               |
| CT chest spine without dye          | 72128       | CPT-4               |
| CT chest spine with dye             | 72129       | CPT-4               |
| CT chest spine without & with dye   | 72130       | CPT-4               |
| CT scan/thoracic aorta              | B320        | ICD10               |
| CT scan THOR aorta HI OSMLR CONTRST | B3200ZZ     | ICD10               |
| CT scan THOR aorta OTH CONTRST      | B320YZZ     | ICD10               |
| CT scan thoracic aorta IV OPT COH   | B320Z2Z     | ICD10               |
| CT scan of thoracic aorta           | B320ZZZ     | ICD10               |
| CT scan/trachea/airways             | BB2F        | ICD10               |
| CT TR/airways HI OSM CONT UN/ENHNCD | BB2F00Z     | ICD10               |
| CT scan TR/airways HI OSMLR CONTRST | BB2F0ZZ     | ICD10               |
| CT TR/airways L OSM CONT UN/ENHNCD  | BB2F10Z     | ICD10               |
| CT scan TR/airways L OSMLR CONTRST  | BB2F1ZZ     | ICD10               |
| CT TRACH/airways OTH CONT UN/ENHNCD | BB2FY0Z     | ICD10               |
| CT scan TR/airways OTH CONTRST      | BB2FYZZ     | ICD10               |
| CT scan of trachea/airways          | BB2FZZZ     | ICD10               |
| CT scan/thorax                      | BP2W        | ICD10               |
| CT scan THOR HI osmolar CONTRST     | BP2W0ZZ     | ICD10               |
| CT scan THOR LOW osmolar CONTRST    | BP2W1ZZ     | ICD10               |

| <b>Procedure</b>                      | <b>Code</b> | <b>Type of Code</b> |
|---------------------------------------|-------------|---------------------|
| CT scan thorax other contrast         | BP2WYZZ     | ICD10               |
| CT scan/thoracic spine                | BR27        | ICD10               |
| CT scan of thoracic spine             | BR27ZZZ     | ICD10               |
| CT scan/chest & abdomen               | BW24        | ICD10               |
| CT scan chest ABD OTH CONTRST         | BW24YZZ     | ICD10               |
| CT scan of chest & abdomen            | BW24ZZZ     | ICD10               |
| CT scan/chest abdomen & pelvis        | BW25        | ICD10               |
| CT scan chest abdomen & pelvis        | BW25ZZZ     | ICD10               |
| Other X-ray of thorax                 | 874         | ICD-9               |
| CAT of thorax                         | 8741        | ICD-9               |
| Routine chest x-ray so described      | 8744        | ICD-9               |
| Other chest X-ray                     | 8749        | ICD-9               |
| Soft tissue X-ray of thorax           | 873         | ICD-9               |
| Endotracheal bronchogram              | 8731        | ICD-9               |
| Other contrast bronchogram            | 8732        | ICD-9               |
| Mediastinal pneumogram                | 8733        | ICD-9               |
| Sinogram of chest wall                | 8738        | ICD-9               |
| Other soft tissue X-ray chest wall    | 8739        | ICD-9               |
| Diagnostic procedures lung & bronchus | 332         | ICD-9               |
| Thoracoscopic lung biopsy             | 3320        | ICD-9               |
| Bronchoscopy thru artificial stoma    | 3321        | ICD-9               |
| Fiber-optic bronchoscopy              | 3322        | ICD-9               |
| Other bronchoscopy                    | 3323        | ICD-9               |
| Closed biopsy of bronchus             | 3324        | ICD-9               |
| Open biopsy of bronchus               | 3325        | ICD-9               |
| Closed biopsy of lung                 | 3326        | ICD-9               |
| Closed endoscopic biopsy of lung      | 3327        | ICD-9               |
| Open biopsy of lung                   | 3328        | ICD-9               |
| Other diagnostic PROC lung/bronchus   | 3329        | ICD-9               |

**Suppl. Table 4.** Baseline demographic, clinical characteristics, and concomitant medications for the unmatched cohorts.

| Measure                                                                                                                             |                    | Unmatched Cohorts              |                                              | P-value <sup>b</sup> |
|-------------------------------------------------------------------------------------------------------------------------------------|--------------------|--------------------------------|----------------------------------------------|----------------------|
|                                                                                                                                     |                    | Budesonide Comparator (n=4236) | Budesonide Reference (n=17,393) <sup>a</sup> |                      |
| Year of index prescription date                                                                                                     | Median (IQR)       | 2010 (2009, 2011)              | 2009 (2009, 2010)                            | <0.001 <sup>c</sup>  |
| Age at index prescription date (years)                                                                                              | Median (IQR)       | 4 (2, 6)                       | 6 (4, 11)                                    | <0.001 <sup>c</sup>  |
| Distribution of patients among age categories, n (%)                                                                                | Pediatric (0-11 y) | 3893 (91.9)                    | 13,146 (75.6)                                | <0.001               |
|                                                                                                                                     | Adults (12+ y)     | 343 (8.1)                      | 4247 (24.4)                                  |                      |
| Gender, n (%)                                                                                                                       | Male               | 2589 (61.1)                    | 10,560 (60.7)                                | 0.604                |
| Patients with rhinitis diagnosis <sup>d</sup> , n (%)                                                                               | Yes                | 3168 (74.8)                    | 14,414 (82.9)                                | <0.001               |
| Patients with rhinitis diagnosis and/or received nasal spray <sup>d</sup> , n (%)                                                   | Yes                | 3229 (76.2)                    | 15,006 (86.3)                                | <0.001               |
| Patients with GERD diagnosis <sup>d</sup> , n (%)                                                                                   | Yes                | 896 (21.2)                     | 6527 (37.5)                                  | <0.001               |
| Patients with oral thrush (both diagnosis and received treatment) <sup>d</sup> , n (%)                                              | Yes                | 8 (0.2)                        | 143 (0.8)                                    | <0.001               |
| Patients who received paracetamol prescriptions, n (%)                                                                              | Yes                | 332 (7.8)                      | 3746 (21.5)                                  | <0.001               |
| Distribution of patients among CCI score categories <sup>e</sup> , n (%)                                                            | 0                  | 1293 (30.5)                    | 2378 (13.7)                                  | <0.001               |
|                                                                                                                                     | 1-4                | 2786 (65.8)                    | 12,524 (72.0)                                |                      |
|                                                                                                                                     | ≥5                 | 157 (3.7)                      | 2488 (14.3)                                  |                      |
| SABA inhalers daily dose (µg) in the year before index prescription date <sup>f</sup> , categorized, n (%)                          | 0                  | 3256 (76.9)                    | 11,053 (63.5)                                | <0.001               |
|                                                                                                                                     | 1-100              | 810 (19.1)                     | 4382 (25.2)                                  |                      |
|                                                                                                                                     | 101-200            | 30 (0.7)                       | 403 (2.3)                                    |                      |
|                                                                                                                                     | 201-400            | 77 (1.8)                       | 759 (4.4)                                    |                      |
|                                                                                                                                     | ≥401               | 63 (1.5)                       | 796 (4.6)                                    |                      |
| Prescriptions for acute courses of oral corticosteroids in the year before index prescription date, <sup>g</sup> categorized, n (%) | 0                  | 3858 (91.1)                    | 13,720 (78.9)                                | <0.001               |
|                                                                                                                                     | 1                  | 215 (5.1)                      | 1730 (9.9)                                   |                      |
|                                                                                                                                     | 2                  | 85 (2.0)                       | 728 (4.2)                                    |                      |
|                                                                                                                                     | ≥3                 | 78 (1.8)                       | 1215 (7.0)                                   |                      |
| Baseline ICS inhalers daily dose (µg) <sup>f</sup> , n (%)                                                                          | 0                  | 3889 (91.8)                    | 14,806 (85.1)                                | <0.001               |
|                                                                                                                                     | >1-100             | 323 (7.6)                      | 2062 (11.9)                                  |                      |
|                                                                                                                                     | 101-200            | 18 (0.4)                       | 293 (1.7)                                    |                      |
|                                                                                                                                     | 201-400            | 5 (0.1)                        | 154 (0.9)                                    |                      |
|                                                                                                                                     | ≥401               | 1 (0)                          | 77 (0.4)                                     |                      |

**Abbreviations:** CCI, Charlson Comorbidity Index; GERD, gastroesophageal reflux disease; ICS, inhaled corticosteroid; IQR, interquartile range; N/A, not available; SABA, short-acting β<sub>2</sub>-agonist, Y, year.

<sup>a</sup>Patients may be included more than once in the budesonide reference continuation patient group if their index prescription date satisfied the criterion of 2 years of continuous data (1 year before and 1 year after the index prescription date). Number of unique participants in the budesonide reference cohort is 8780.

<sup>b</sup>P-value based on Chi-square test.

<sup>c</sup>P-value based on Mann-Whitney test.

<sup>d</sup>Through GP visits in the study period (2008-2012). ICD-9 codes used for comorbidities: rhinitis, 472.0 or 477; GERD, 530.81; oral thrush, 1120.

<sup>e</sup>Calculated using the Charlson Comorbidity Index (using ICD-9 codes) over the 1-year prior to (and including) prescription date.

<sup>f</sup>Daily dose calculated as: (count of inhalers \* doses in pack) / 365) \*μg strength.

<sup>g</sup>All courses where dosing instructions suggest exacerbation treatment (eg, 6000, 5000, 4000, 3000, 2000, 1000 reducing, or 30000 μg as directed) and/or all courses unlikely to be maintenance therapy, ie, with no dosing instructions but recorded within a ±5-day window from a lower respiratory event.

**Suppl. Table 5.** Baseline asthma control in the unmatched cohorts.

| Measure                                                                                                                        | Unmatched Cohorts              |                                              | P-value <sup>b</sup> |
|--------------------------------------------------------------------------------------------------------------------------------|--------------------------------|----------------------------------------------|----------------------|
|                                                                                                                                | Budesonide Comparator (n=4236) | Budesonide Reference (n=17,393) <sup>a</sup> |                      |
| Risk-domain asthma control <sup>c</sup> in the year prior to (and including) the index prescription date, n (%)                |                                |                                              | <0.001               |
| Controlled                                                                                                                     | 1254 (29.6)                    | 3987 (22.9)                                  |                      |
| Uncontrolled                                                                                                                   | 2982 (70.4)                    | 13,406 (77.1)                                |                      |
| Overall asthma control <sup>d</sup> in the year prior to (and including) the index prescription date, n (%)                    |                                |                                              | <0.001               |
| Controlled                                                                                                                     | 1187 (28.0)                    | 3538 (20.3)                                  |                      |
| Uncontrolled                                                                                                                   | 3049 (72.0)                    | 13,855 (79.7)                                |                      |
| Number of asthma-related hospitalizations <sup>e</sup> in the year prior to (and including) the index prescription date, n (%) |                                |                                              | <0.001               |
| None                                                                                                                           | 3056 (72.1)                    | 12,239 (70.40)                               |                      |
| 1                                                                                                                              | 812 (19.2)                     | 3134 (18.0)                                  |                      |
| 2                                                                                                                              | 257 (6.1)                      | 1104 (6.3)                                   |                      |
| ≥3                                                                                                                             | 111 (2.6)                      | 916 (5.3)                                    |                      |
| Number of asthma ATS/ERS exacerbations <sup>f</sup> , n (%)                                                                    |                                |                                              | <0.001               |
| None                                                                                                                           | 3044 (71.9)                    | 10,914 (62.7)                                |                      |
| 1                                                                                                                              | 821 (19.4)                     | 3663 (21.1)                                  |                      |
| 2-3                                                                                                                            | 312 (7.4)                      | 1921 (11.0)                                  |                      |
| ≥4                                                                                                                             | 59 (1.4)                       | 895 (5.1)                                    |                      |
| Number of asthma “clinical” exacerbations <sup>g</sup> , n (%)                                                                 |                                |                                              | <0.001               |
| None                                                                                                                           | 1254 (29.6)                    | 3987 (22.9)                                  |                      |
| 1                                                                                                                              | 1274 (30.1)                    | 4425 (25.4)                                  |                      |
| 2-3                                                                                                                            | 1315 (31.0)                    | 5503 (31.6)                                  |                      |
| ≥4                                                                                                                             | 393 (9.3)                      | 3478 (20.0)                                  |                      |

**Abbreviations:** ATS/ERS, American Thoracic Society/European Respiratory Society.

<sup>a</sup>Patients may be included more than once in the budesonide reference continuation patient group if their index prescription date satisfied the criterion of 2 years of continuous data (1 year before and 1 year after the index prescription date). Number of unique participants in the budesonide reference cohort is 8780.

<sup>b</sup>P-value based on Chi-square test.

<sup>c</sup>Risk-domain asthma control defined as the absence of asthma clinical exacerbations and outpatient department attendances.

<sup>d</sup>Overall asthma control defined as risk-domain asthma control and average daily dose of ≤180 µg albuterol.

<sup>e</sup>Asthma-related hospitalizations include asthma-related emergency department attendance or inpatient admissions (diagnosis and procedure codes shown in Supplemental Tables 2 and 3).

<sup>f</sup>ATS/ERS exacerbation includes asthma-related emergency department attendance or inpatient admissions or prescription for an acute course of oral corticosteroids from a lower respiratory event (diagnosis and procedure codes shown in Supplemental Tables 2 and 3).

<sup>g</sup>Clinical exacerbation includes ATS/ERS definition or prescription for antibiotics from a lower respiratory event.



**Suppl. Table 6.** Adverse events by system organ class at baseline in the unmatched cohorts.

| AEs                                                                                                                                        | Unmatched Cohorts                    |                                                    |                                  |
|--------------------------------------------------------------------------------------------------------------------------------------------|--------------------------------------|----------------------------------------------------|----------------------------------|
|                                                                                                                                            | Budesonide<br>Comparator<br>(n=4236) | Budesonide<br>Reference<br>(n=17,393) <sup>a</sup> | <i>P</i> -<br>value <sup>b</sup> |
| Infections and infestations, n (%)<br>(candidiasis of the mouth and throat)                                                                |                                      |                                                    | 0.572                            |
| None                                                                                                                                       | 4231 (99.9)                          | 17,366 (99.8)                                      |                                  |
| 1                                                                                                                                          | 0                                    | 0                                                  |                                  |
| ≥2                                                                                                                                         | 5 (0.1)                              | 27 (0.2)                                           |                                  |
| Immune system disorder, n (%)<br>(cutaneous hypersensitivity reactions, angiodema, anaphylactic reactions)                                 |                                      |                                                    | NA                               |
| None                                                                                                                                       | 4236 (100)                           | 17,393 (100)                                       |                                  |
| ≥1                                                                                                                                         | 0                                    | 0                                                  |                                  |
| Endocrine disorders, n (%)<br>(adrenal suppression, growth retardation in children)                                                        |                                      |                                                    | NA                               |
| None                                                                                                                                       | 4236 (100)                           | 17,393 (100)                                       |                                  |
| ≥1                                                                                                                                         | 0                                    | 0                                                  |                                  |
| Metabolism and nutrition disorders, n (%) (hypokalemia, hyperglycemia)                                                                     |                                      |                                                    | NA                               |
| None                                                                                                                                       | 4236 (100)                           | 17,393 (100)                                       |                                  |
| ≥1                                                                                                                                         | 0                                    | 0                                                  |                                  |
| Psychiatric disorders, n (%)<br>(anxiety, insomnia, behavioral changes, depression, aggression, hyperactivity in children)                 |                                      |                                                    | NA                               |
| None                                                                                                                                       | 4236 (100)                           | 17,393 (100)                                       |                                  |
| ≥1                                                                                                                                         | 0                                    | 0                                                  |                                  |
| Eye disorders, n (%)<br>(cataract, glaucoma)                                                                                               |                                      |                                                    | NA                               |
| None                                                                                                                                       | 4236 (100)                           | 17,393 (100)                                       |                                  |
| ≥1                                                                                                                                         | 0                                    | 0                                                  |                                  |
| Respiratory, thoracic, and mediastinal disorders, n (%)<br>(throat irritation, hoarseness/dysphonia, brochospasm/paradoxical bronchospasm) |                                      |                                                    | NA                               |
| None                                                                                                                                       | 4236 (100)                           | 17,393 (100)                                       |                                  |
| ≥1                                                                                                                                         | 0                                    | 0                                                  |                                  |
| Skin and subcutaneous tissue disorders, n (%)<br>(bruising)                                                                                |                                      |                                                    | NA                               |
| None                                                                                                                                       | 4236 (100)                           | 17,393 (100)                                       |                                  |
| ≥1                                                                                                                                         | 0                                    | 0                                                  |                                  |

**Abbreviations:** AEs, adverse events.

<sup>a</sup>Patients may be included more than once in the budesonide reference continuation patient group if their index prescription date satisfied the criterion of 2 years of continuous data (1 year before and 1 year after the index prescription date). Number of unique participants in the budesonide reference cohort is 8780.

<sup>b</sup>*P*-value based on Chi-square test.
